# Supplementary material for: Gerstmann-Sträussler-Scheinker disease revisited: accumulation of covalently-linked multimers of internal prion protein fragments
Source: PubMed Central journal article supplement (PMC6540574; doi:10.1186/s40478-019-0734-2), 2019-05-29
Supplement: 40478_2019_734_MOESM2_ESM.pdf [file 40478_2019_734_MOESM2_ESM.pdf]

## **Gerstmann-Sträussler-Scheinker disease revisited: Accumulation of covalently-linked multimers of internal prion protein fragments**

Laura Cracco<sup>1</sup>, Xiangzhu Xiao<sup>2,\*</sup>, Satish K. Nemani<sup>1,\*</sup>, Jody Lavrich<sup>1</sup>, Ignazio Cali<sup>1,3</sup>, Bernardino Ghetti<sup>4</sup>, Silvio Notari<sup>1</sup>, Witold K. Surewicz<sup>2</sup>, Pierluigi Gambetti<sup>1,✉</sup>

<sup>1</sup>Department of Pathology, Case Western Reserve University, Cleveland, OH, USA.

<sup>2</sup>Department of Physiology and Biophysics, Case Western Reserve University, Cleveland, OH, USA.

<sup>3</sup>National Prion Disease Pathology Surveillance Center, Case Western Reserve University, Cleveland, OH, USA.

<sup>4</sup>Department of Pathology and Laboratory Medicine, Indiana University School of Medicine, Indianapolis, IN, USA.

\*The two authors have equally contributed to the study

✉ Corresponding author: Pierluigi Gambetti, Department of Pathology, Case Western Reserve University, 2085 Adelbert Road, Room 419, Cleveland, OH 44106, USA. Phone: +1-216-410-6883, email: pxg13@case.edu.

## Supplementary Material

**Figure S1.** Further biochemical characterization of resPrP<sup>D</sup> associated with GSS<sup>F198S</sup>. Lane 1: PNGase F-deglycosylated resPrP<sup>D</sup> from brain homogenate immunoblotted with 3F4 following standard conditions. Lane 2: with additional boiling, freezing-thawing and sonication pre-deglycosylation; lane 3: 41h PNGase F treatment; lanes 4-7: incubation with strong denaturants, 8M urea (after ethanol or methanol precipitation, lanes 4, 5) and 8M guanidine hydrochloride at 80° C (after ethanol or methanol precipitation, lanes 6, 7) pre-deglycosylation. Treatments had no detectable effect on the resPrP<sup>D</sup> electrophoretic profile.

**Table S1.** Tryptic peptides identified for ~7 KDa band in GSS<sup>A117V</sup> resPrP<sup>D</sup>. Residue at position 129 is marked in blue.

|                     | Peptide | 129M/V              | Sequence                                | Mass (calculated) | Mass (experimental) | Note                       |
|---------------------|---------|---------------------|-----------------------------------------|-------------------|---------------------|----------------------------|
| N-terminal peptides | 78-104  |                     | GGGWGQPHGGGWQGGGTHSQWNKPSK              | 2701.2283         | 2701.2345           |                            |
|                     | 82-101  |                     | GQPHGGGWQGGGTHSQWNK                     | 2031.9049         | 2031.9058           |                            |
|                     | 82-104  |                     | GQPHGGGWQGGGTHSQWNKPSK                  | 2344.0846         | 2344.0849           |                            |
|                     | 82-106  |                     | GQPHGGGWQGGGTHSQWNKPSKPK                | 2569.2323         | 2569.2341           |                            |
|                     | 85-101  |                     | HGGGWGQGGGTHSQWNK                       | 1749.7720         | 1749.7733           |                            |
|                     | 86-101  |                     | GGGWGQGGGTHSQWNK                        | 1612.7131         | 1612.7140           |                            |
|                     | 86-104  |                     | GGGWGQGGGTHSQWNKPSK                     | 1924.8929         | 1924.8963           |                            |
|                     | 86-106  |                     | GGGWGQGGGTHSQWNKPSKPK                   | 2150.0406         | 2150.0411           |                            |
|                     | 87-101  |                     | GGWGQGGGTHSQWNK                         | 1555.6917         | 1555.6936           |                            |
|                     | 87-104  |                     | GGWGQGGGTHSQWNKPSK                      | 1867.8714         | 1867.8729           |                            |
|                     | 87-106  |                     | GGWGQGGGTHSQWNKPSKPK                    | 2093.0191         | 2093.0192           |                            |
|                     | 88-101  |                     | GWGQGGGTHSQWNK                          | 1498.6702         | 1498.6710           |                            |
|                     | 88-104  |                     | GWGQGGGTHSQWNKPSK                       | 1810.8499         | 1810.8506           |                            |
| 88-106              |         | GWGQGGGTHSQWNKPSKPK | 2035.9977                               | 2035.9983         |                     |                            |
| middle peptides     | 107-136 | 129V                | K.TNMKHMAGAAVAGAVVGLGGYVLGSAMSR         | 2880.4045         | 2880.4054           | Oxidation of 3 methionines |
|                     | 111-136 |                     | K.HMAGAAVAGAVVGLGGYVLGSAMSR             | 2358.1937         | 2358.1937           |                            |
|                     | 111-136 |                     | K.HMAGAAVAGAVVGLGGYVLGSAMSR             | 2374.1886         | 2374.1888           | Oxidation of 1 methionine  |
|                     | 111-136 |                     | K.HMAGAAVAGAVVGLGGYVLGSAMSR             | 2390.1835         | 2390.1837           | Oxidation of 2 methionines |
|                     | 111-148 |                     | K.HMAGAAVAGAVVGLGGYVLGSAMSRPIIHFGSDYEDR | 3787.8563         | 3787.8571           |                            |
|                     | 111-148 |                     | K.HMAGAAVAGAVVGLGGYVLGSAMSRPIIHFGSDYEDR | 3803.8512         | 3803.8515           | Oxidation of 1 methionine  |
|                     | 111-148 |                     | K.HMAGAAVAGAVVGLGGYVLGSAMSRPIIHFGSDYEDR | 3819.8461         | 3819.8461           | Oxidation of 2 methionines |
| C-terminal peptides | 137-141 |                     | R.PIIHF                                 | 625.3588          | 625.3589            |                            |
|                     | 137-142 |                     | R.PIIHFG                                | 682.3802          | 682.3806            |                            |
|                     | 137-143 |                     | R.PIIHFGS                               | 769.4123          | 769.4137            |                            |
|                     | 137-144 |                     | R.PIIHFGSD                              | 884.4392          | 884.4391            |                            |
|                     | 137-145 |                     | R.PIIHFGSDY                             | 1047.5025         | 1047.5040           |                            |
|                     | 137-146 |                     | R.PIIHFGSDYE                            | 1176.5451         | 1176.5510           |                            |
|                     | 137-147 |                     | R.PIIHFGSDYED                           | 1291.5721         | 1291.5727           |                            |
|                     | 137-148 |                     | R.PIIHFGSDYEDR                          | 1447.6732         | 1447.6734           |                            |
|                     | 137-149 |                     | R.PIIHFGSDYEDRY                         | 1610.7365         | 1610.7376           |                            |
|                     | 137-150 |                     | R.PIIHFGSDYEDRYR                        | 1773.7998         | 1773.8003           |                            |
|                     | 137-151 |                     | R.PIIHFGSDYEDRYR                        | 1929.9009         | 1929.9052           |                            |
|                     | 137-152 |                     | R.PIIHFGSDYEDRYRE                       | 2058.9435         | 2059.9217           |                            |

**Table S2.** Tryptic peptides identified for ~8 KDa band in GSS<sup>F198S</sup> resPrP<sup>D</sup>.

|                     | Peptide | 129M/V                                  | Sequence                                | Mass (calculated) | Mass (experimental)        | Note                       |
|---------------------|---------|-----------------------------------------|-----------------------------------------|-------------------|----------------------------|----------------------------|
| N-terminal peptides | 70-101  |                                         | GGGWGQPHGGGWGQPHGGGWGQGGGTHSQWNK        | 3165.3840         | 3165.3854                  |                            |
|                     | 70-104  |                                         | GGGWGQPHGGGWGQPHGGGWGQGGGTHSQWNKPSK     | 3477.5638         | 3477.5649                  |                            |
|                     | 71-101  |                                         | GGWGQPHGGGWGQPHGGGWGQGGGTHSQWNK         | 3108.3626         | 3108.3630                  |                            |
|                     | 72-101  |                                         | GWGQPHGGGWGQPHGGGWGQGGGTHSQWNK          | 3051.3411         | 3051.3403                  |                            |
|                     | 72-104  |                                         | GWGQPHGGGWGQPHGGGWGQGGGTHSQWNKPSK       | 3363.5208         | 3363.5251                  |                            |
|                     | 74-101  |                                         | GQPHGGGWGQPHGGGWGQGGGTHSQWNK            | 2808.2403         | 2808.2424                  |                            |
|                     | 74-104  |                                         | GQPHGGGWGQPHGGGWGQGGGTHSQWNKPSK         | 3120.4201         | 3120.4206                  |                            |
|                     | 74-106  |                                         | GQPHGGGWGQPHGGGWGQGGGTHSQWNKPSKPK       | 3345.5678         | 3345.5678                  |                            |
|                     | 78-101  |                                         | GGGWGQPHGGGWGQGGGTHSQWNK                | 2389.0486         | 2389.0450                  |                            |
|                     | 78-104  |                                         | GGGWGQPHGGGWGQGGGTHSQWNKPSK             | 2701.2283         | 2701.2325                  |                            |
|                     | 78-106  |                                         | GGGWGQPHGGGWGQGGGTHSQWNKPSKPK           | 2926.3761         | 2926.3754                  |                            |
|                     | 79-106  |                                         | GGWGQPHGGGWGQGGGTHSQWNKPSKPK            | 2869.3546         | 2869.3620                  |                            |
|                     | 82-101  |                                         | GQPHGGGWGQGGGTHSQWNK                    | 2031.9049         | 2031.9092                  |                            |
|                     | 82-104  |                                         | GQPHGGGWGQGGGTHSQWNKPSK                 | 2344.0846         | 2344.0936                  |                            |
|                     | 82-106  |                                         | GQPHGGGWGQGGGTHSQWNKPSKPK               | 2569.2323         | 2569.2341                  |                            |
|                     | 86-101  |                                         | GGGWGQGGGTHSQWNK                        | 1612.7131         | 1612.7177                  |                            |
|                     | 86-104  |                                         | GGGWGQGGGTHSQWNKPSK                     | 1924.8929         | 1924.8946                  |                            |
|                     | 86-106  |                                         | GGGWGQGGGTHSQWNKPSKPK                   | 2150.0406         | 2150.0407                  |                            |
| 90-106              |         | GQGGGTHSQWNKPSKPK                       | 1792.8969                               | 1792.9002         |                            |                            |
| middle peptides     | 107-136 | 129M                                    | K.TNMKHMAGAAAAGAVVGGGLGGYMLGSAMSR       | 2852.3554         | 2852.3681                  | Oxidation of 1 methionine  |
|                     | 111-136 |                                         | K.HMAGAAAAGAVVGGGLGGYMLGSAMSR           | 2378.1293         | 2378.1236                  | Oxidation of 1 methionine  |
|                     | 111-136 |                                         | K.HMAGAAAAGAVVGGGLGGYMLGSAMSR           | 2394.1243         | 2394.1223                  | Oxidation of 2 methionines |
|                     | 111-136 |                                         | K.HMAGAAAAGAVVGGGLGGYMLGSAMSR           | 2410.1192         | 2410.1186                  | Oxidation of 3 methionines |
|                     | 107-136 | 129V                                    | K.TNMKHMAGAAAAGAVVGGGLGGYVLSAMSR        | 2836.3782         | 2836.3754                  | Oxidation of 2 methionines |
|                     | 107-136 |                                         | K.TNMKHMAGAAAAGAVVGGGLGGYVLSAMSR        | 2852.3732         | 2852.3735                  | Oxidation of 3 methionines |
|                     | 111-136 |                                         | K.HMAGAAAAGAVVGGGLGGYVLSAMSR            | 2330.1624         | 2330.1630                  |                            |
|                     | 111-136 |                                         | K.HMAGAAAAGAVVGGGLGGYVLSAMSR            | 2346.1573         | 2346.1578                  | Oxidation of 1 methionine  |
|                     | 111-136 |                                         | K.HMAGAAAAGAVVGGGLGGYVLSAMSR            | 2362.1522         | 2362.1532                  | Oxidation of 2 methionines |
|                     | 111-148 |                                         | K.HMAGAAAAGAVVGGGLGGYVLSAMSRPIIFGSDYEDR | 3775.8199         | 3776.8312                  | Oxidation of 1 methionine  |
| 111-148             |         | K.HMAGAAAAGAVVGGGLGGYVLSAMSRPIIFGSDYEDR | 3791.8184                               | 3791.8163         | Oxidation of 2 methionines |                            |
| C-terminal peptides | 137-141 |                                         | R.PIIHF                                 | 625.3588          | 625.3590                   |                            |
|                     | 137-142 |                                         | R.PIIHFG                                | 682.3802          | 682.3802                   |                            |
|                     | 137-143 |                                         | R.PIIHFGS                               | 769.4123          | 769.4120                   |                            |
|                     | 137-144 |                                         | R.PIIHFGSD                              | 884.4392          | 884.4397                   |                            |
|                     | 137-145 |                                         | R.PIIHFGSDY                             | 1047.5025         | 1047.5023                  |                            |
|                     | 137-146 |                                         | R.PIIHFGSDYE                            | 1176.5451         | 1176.5479                  |                            |
|                     | 137-147 |                                         | R.PIIHFGSDYED                           | 1291.5721         | 1291.5721                  |                            |
|                     | 137-148 |                                         | R.PIIHFGSDYEDR                          | 1447.6732         | 1447.6731                  |                            |
|                     | 137-149 |                                         | R.PIIHFGSDYEDRY                         | 1610.7365         | 1061.7372                  |                            |
|                     | 137-150 |                                         | R.PIIHFGSDYEDRYR                        | 1773.7998         | 1773.8005                  |                            |
|                     | 137-151 |                                         | R.PIIHFGSDYEDRYR                        | 1929.9009         | 1930.8829                  |                            |
|                     | 137-152 |                                         | R.PIIHFGSDYEDRYRE                       | 2058.9435         | 2059.9249                  |                            |
